# Supplementary material for: State of the art baseband DSP platforms for Software Defined Radio: A survey
Source: Springer Nature journal article supplement (doi:10.1186/1687-1499-2011-5), 2011-06-06
Supplement: 13638_2010_6_MOESM1_ESM.pdf [file 13638_2010_6_MOESM1_ESM.pdf]

# Software Defined Radio Architectures

```
graph TD; A[Software Defined Radio Architectures] --> B[Processor Centered Architectures]; A --> C[Reconfigurable Coarse Grained Architectures]; B --> D["ASIP/DSP (Leocore, Sandblaster, ConnXBBE, EVP etc.)"]; B --> E["Many-Core (SODA, tomahawk, Infineon etc.)"]; C --> F["Montium, BUTTER, CREMA, HERS, ADRES etc."];
```

## Processor Centered Architectures

ASIP/DSP (Leocore, Sandblaster, ConnXBBE, EVP etc.)

Many-Core (SODA, tomahawk, Infineon etc.)

## Reconfigurable Coarse Grained Architectures

Montium, BUTTER, CREMA, HERS, ADRES etc.
