# Supplementary material for: State of the art baseband DSP platforms for Software Defined Radio: A survey
Source: Springer Nature journal article supplement (doi:10.1186/1687-1499-2011-5), 2011-06-06

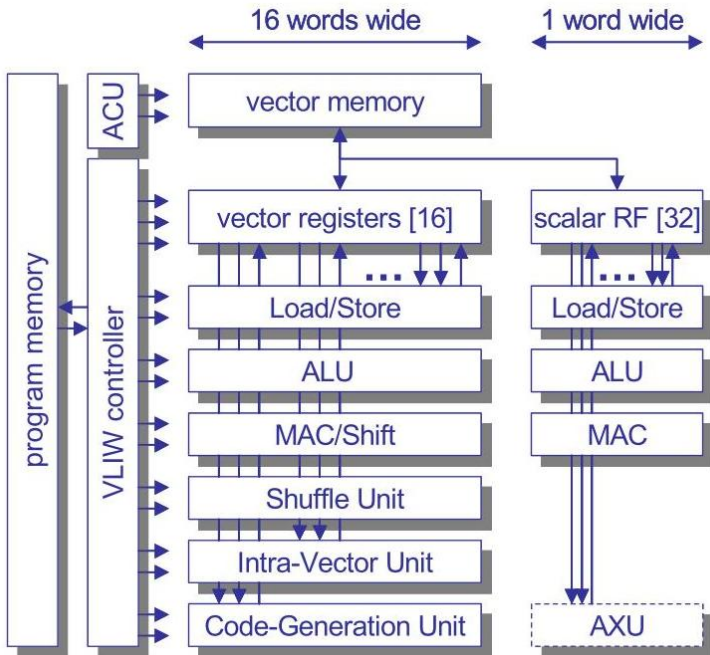

Supplement: 13638_2010_6_MOESM5_ESM.pdf [file 13638_2010_6_MOESM5_ESM.pdf]
